# Supplementary material for: Composites of chemically-reduced graphene oxide sheets and carbon nanospheres with three-dimensional network structure as anode materials for lithium ion batteries
Source: Royal Society of Chemistry journal article supplement (doi:10.1039/c2jm34843h), 2012-01-01
Supplement: c2jm34843h.pdf [file c2jm34843h.pdf]

## Supporting Information

### Composites of Chemically Reduced Graphene Oxide and Carbon Nanospheres with Three-dimensional Network Structures as Anode Materials for Lithium Ion Batteries

Yongqiang Yang, Ruiqing Pang, Xuejiao Zhou, Yan Zhang, Haixia Wu, \* and  
Shouwu Guo\*

Key Laboratory for Thin Film and Microfabrication of the Ministry of Education,  
Research Institute of Micro/Nano Science and Technology, Shanghai Jiao Tong  
University, Shanghai 200240, P. R. China

E-mail: swguo@sjtu.edu.cn; haixiawu@sjtu.edu.cn

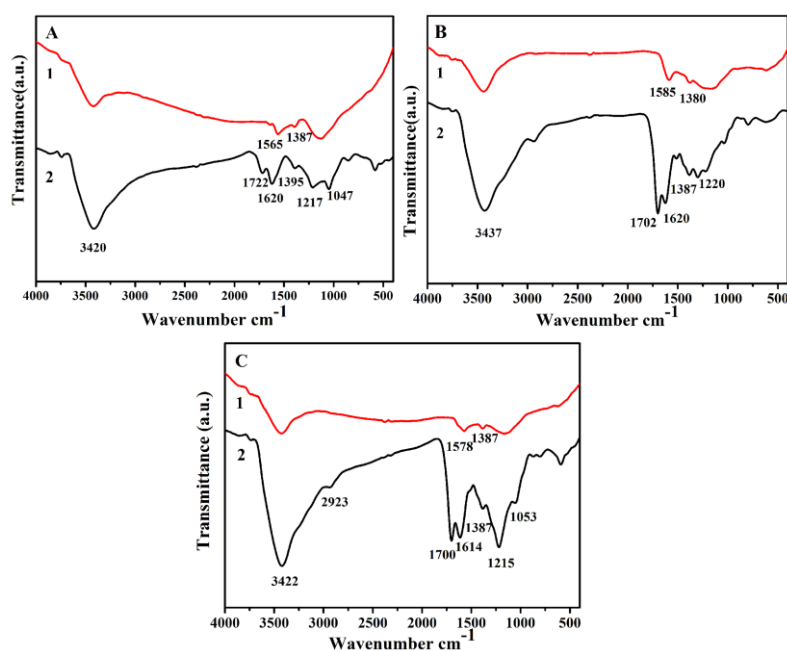

**Figure S1.** FTIR spectral of (A) graphene oxide, (B) carbon sphere, and (C) composites (CRG/CNS10-1) before (line 2) and after (line 1) being annealed at 900 °C in Ar mixed with 5% of H<sub>2</sub> (in volume) for 3 h.

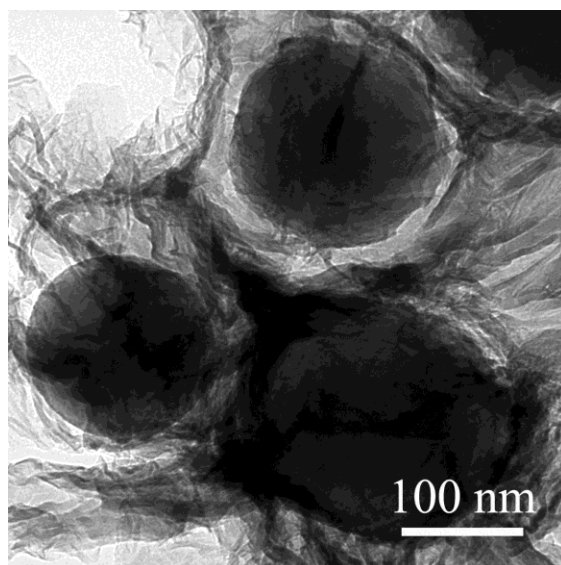

**Figure S2.** TEM images of CRG/CNS10-1 composite.

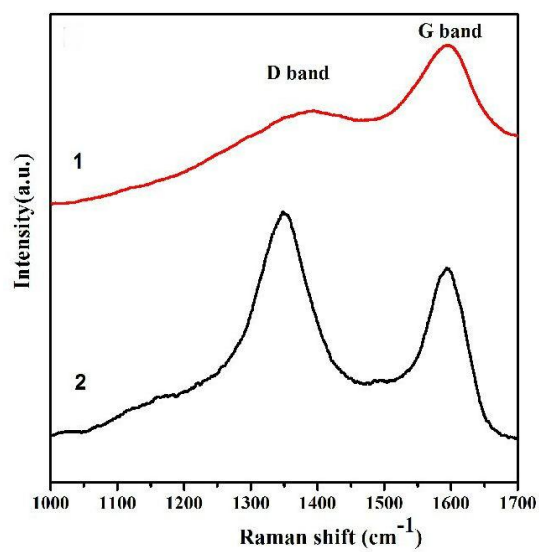

**Figure S3.** Raman spectra of the CRG/CNS10-1 composite before (line 1) and after (line 2) being annealed at 900 °C in Ar mixed with 5% of H<sub>2</sub> (in volume) for 3 h.

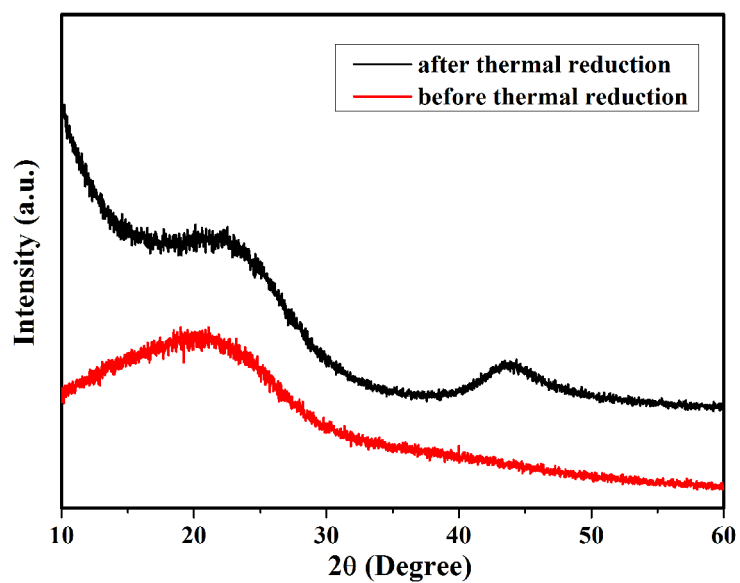

**Figure S4.** The XRD patterns of the carbon spheres before/after thermal reduction (being annealed at 900 °C in Ar mixed with 5% of H<sub>2</sub> for 3 h).

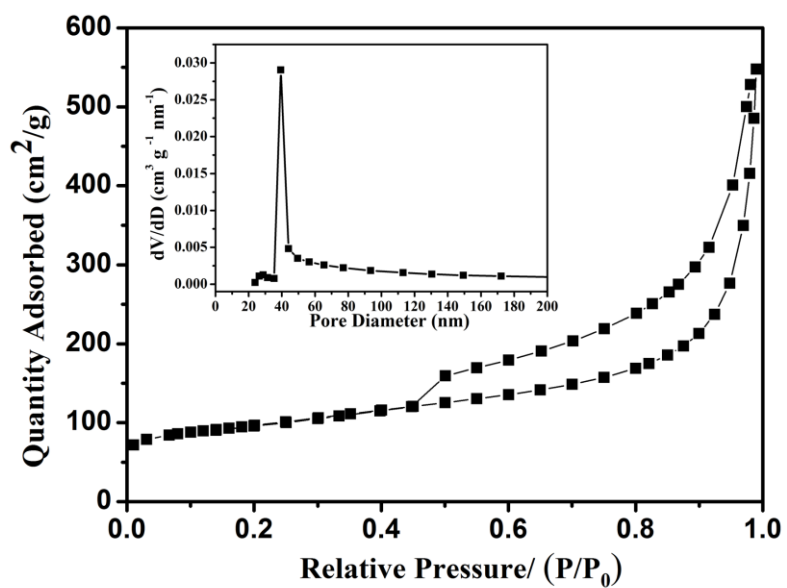

**Figure S5.** N<sub>2</sub> adsorption/desorption isotherms of CRG/CNS10-1 composite. Inset shows pore size distribution.

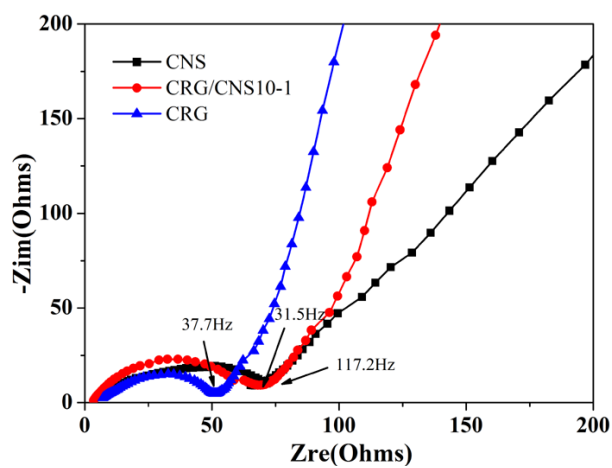

**Figure S6.** AC impedance spectra of the electrode after 10 charge-discharge cycles.
